# Supplementary material
Source: publisher figshare collection journal article supplement (https://diabetesjournals.figshare.com/ndownloader/files/24241934)
Supplement: Supplementary file 1 [file 24241934]

## Supplementary Material for

### Longitudinal Plasma Kallikrein Levels and their Association with the Risk of Cardiovascular Disease Outcomes in Type 1 Diabetes in DCCT/EDIC

Miran A Jaffa, Ionut Bebu, Deirdre Luttrell, Barbara H Braffett, John M Lachin,

Kelly Hunt, Maria Lopes-Virella, Louis Luttrell, Timothy J Lyons, Ayad A Jaffa

and The DCCT/EDIC Research Group

**Table S1.** Comparison of DCCT baseline characteristics of the 693 participants with plasma kallikrein values versus the full DCCT cohort (n=1441 participants).

| Variables                        | Plasma Kallikrein subgroup (n=693) | Entire DCCT cohort (n=1441)  |
|----------------------------------|------------------------------------|------------------------------|
| Group (% experimental)           | 343 (49%)                          | 711 (49%)                    |
| Cohort(% primary)                | 341 (49%)                          | 726 (50%)                    |
| Current smoker (%)               | 115 (17%)                          | 267 (19%)                    |
| Age (year)                       | 26.9±6.9<br>(22,27,32)             | 26.8±7.1<br>(22, 27,32)      |
| Sex (% men)                      | 372 (54%)                          | 761 (53%)                    |
| BMI (kg/m <sup>2</sup> )         | 23.3±2.7<br>(21.2,23.4,25.0)       | 23.4±2.8<br>(21.3,23.3,25.2) |
| Duration of T1D at entry (month) | 65.8±48.2<br>(26,48,102)           | 67.6±49.9<br>(26,49,108)     |
| HbA1c(%)                         | 9.0±1.6<br>(7.8,8.8,9.9)           | 9.1±1.6<br>(7.8, 8.8,10.1)   |
| HbA1c (mmol/mol)                 | 75±17<br>(62,73,85)                | 76±17<br>(62,73,87)          |
| SBP (mmHg)                       | 114.8±11.2<br>(108,115,122)        | 114.1±11.6<br>(106,114,122)  |
| HDL (mg/dL)                      | 50.4±12.2<br>(42,48,57)            | 50.6±12.3<br>(42,49,57)      |
| CHL (mg/dL)                      | 173.5±32.7<br>(151,171,193)        | 176.4±33.2<br>(153,174,197)  |
| TRG (mg/dL)                      | 79.6±46.3<br>(55,69,93)            | 81.3±47.5<br>(55,70,94)      |
|                                  |                                    |                              |
| Any CVD                          | 77 (11%)                           | 184 (13%)                    |
| MACE                             | 35 (5%)                            | 88 (6%)                      |

**Table S2.** Summary of plasma kallikrein values at the six time points (pass) during the DCCT/EDIC study.

| Pass | Plasma Kallikrein |      |       |          | CVD Events |        |
|------|-------------------|------|-------|----------|------------|--------|
|      | Median            | Q1   | Q3    | Missing* | Any CVD**  | MACE** |
| 1    | 65.7              | 52.7 | 82.4  | 4        | 3          | 1      |
| 2    | 61.8              | 49.8 | 75.7  | 27       | 6          | 3      |
| 3    | 63.3              | 52.3 | 77.9  | 72       | 13         | 5      |
| 4    | 90.0              | 69.4 | 117.0 | 146      | 23         | 7      |
| 5    | 91.5              | 73.1 | 110.7 | 89       | 10         | 5      |
| 6    | 92.9              | 72.6 | 113.8 | 1        | 22         | 14     |

Q1=first quartile; Q3=third quartile

\*Out of the 693 participants. \*\*Number of events between pass 1 2, 2 and 3, and so on, and number of events after pass 6. For example, there were 3 any CVD events and 1 MACE event between pass 1 and 2, and there were 22 any CVD events and 14 MACE events after pass 6.

**Table S3.** The associations between the DCCT baseline plasma kallikrein values and the risk of any CVD and MACE over the combined DCCT/EDIC follow-up.

| Outcome | Model* | HR**   | 95% CI           | Z      | p-value       |
|---------|--------|--------|------------------|--------|---------------|
| Any CVD | 1      | 1.1721 | (1.0075,1.3635)  | 2.0566 | <b>0.0397</b> |
|         | 2      | 1.1498 | (0.9851,1.3420)  | 1.7697 | 0.0768        |
|         | 3      | 1.1393 | (0.9721,1.3352)  | 1.6106 | 0.1073        |
| MACE    | 1      | 1.1335 | (0.9004, 1.4268) | 1.0668 | 0.2861        |
|         | 2      | 1.0691 | (0.8354, 1.3680) | 0.5308 | 0.5955        |
|         | 3      | 1.1279 | (0.8909, 1.4281) | 1.0000 | 0.3173        |

\*Model 1: Plasma kallikrein; Model 2: Plasma kallikrein, age, mean HbA1c; Model 3: Plasma kallikrein, age, mean HbA1c, duration of diabetes, mean HDL, mean total cholesterol, mean BMI, (log) mean Triglycerides, mean SBP, gender, Smoking, menopause, use of statin and lipid-lowering medication.

\*\*Hazard ratios (and confidence intervals) are reported per 20 nM higher levels of plasma kallikrein values. HR=hazard ratio, CI=confidence interval. P-values  $\leq 0.05$  are presented in **bold**
